# Supplementary material for: Solution-processed thermally stable amorphous films of small molecular hole injection/transport bi-functional materials and their application in high efficiency OLEDs
Source: Royal Society of Chemistry journal article supplement (doi:10.1039/c5tc02559a), 2015-01-01
Supplement: c5tc02559a1.pdf [file c5tc02559a1.pdf]

1 Electronic Supplementary Material (ESI) for Journal of Materials Chemistry C.

2 This journal is © The Royal Society of Chemistry 2015

3

4 **Electronic Supplementary Information (ESI)**

5

6 **Solution-Processed Thermal-Stable Amorphous Films of Small Molecular**  
7 **Triphenylamine-based Hole Injection/ Transport Bi-functional Materials and its**  
8 **Application in High Efficient OLEDs**

9

10 Xiaoming Zhao<sup>a,b</sup>, Shirong Wang<sup>\*a,b</sup>, Jing You<sup>\*a,b</sup>, Yuteng Zhang<sup>a,b</sup> and Xianggao Li<sup>a,b</sup>

11

12 a. Department of Applied Chemistry, School of Chemical Engineering and Technology,  
13 Tianjin University, Tianjin 300072, China. E-mail: wangshirong@tju.edu.cn

14 b. Collaborative Innovation Center of Chemical Science and Engineering (Tianjin),  
15 Tianjin 300072, China. E-mail: Youj1983@tju.edu.cn

## 1 **Experimental Details**

2

## 3 **General Information**

4

5 Nuclear magnetic resonance (NMR) spectra were recorded on a INOVA 500 MHz  
6 spectrometer. Attenuated Total Reflection Fourier Transfer Infrared spectra (ATR-  
7 FTIR) were recorded using a Nicolet 760 FTIR unit equipped with an MCT detector  
8 cooled with liquid nitrogen. A total of 2000 scans were taken for each spectrum at 2  
9  $\text{cm}^{-1}$  resolution. Mass spectra were recorded on a FINNIGAN LCQ Advantage mass  
10 spectrometer. UV-vis spectra were collected on a Thermo Evolution 300 UV-visible  
11 spectrometer in the  $10^{-5}$  mol  $\text{L}^{-1}$  chloroform solution. Decomposition temperature ( $T_d$ )  
12 and glass transition temperature ( $T_g$ ) of the synthesized compounds were  
13 determined by thermo gravimetric analysis (TGA) and differential scanning  
14 calorimetry (DSC) on a TA Q500 thermo gravimetric analyzer and TA Q20 thermal  
15 analyzer. Cyclic Voltammetry (CV) was carried out on an IM6e electrochemistry  
16 workstation in the  $10^{-3}$  mol  $\text{L}^{-1}$  THF solution with 0.1mol  $\text{L}^{-1}$  tetrabutylammonium  
17 perchlorate (TBAP) as supporting electrolyte, Pt electrode as working electrode and  
18 counter electrode, saturated calomel electrode as reference electrode. The  
19 thicknesses of all spin-coated films were measured by the TencorAlfa Step-500  
20 terrace detector. The active area of the device is  $16 \text{ mm}^2$ , determined by the cross  
21 breadth between the cathode (Al) and the anode (ITO). The scan rate was  $100 \text{ mV s}^{-1}$ .  
22 The XRD images of the films were recorded on a Rigaku D/Max-2500 X-ray  
23 diffractomete. The current density-luminance-voltage ( $J$ - $L$ - $V$ ) characteristics were  
24 performed with a Keithley4200 semiconductor characterization system.. All the  
25 measurements were carried out in air at room temperature without further  
26 encapsulation. The time-of-flight (TOF) measurements were conducted on TOF401  
27 (Sumitomo Heavy Ltd., Japan).

28

## 29 **Hole-only Devices Fabrication**

30

31 Devices were prepared using a structure ITO/HTM (about  $1 \mu\text{m}$ )/Al (120 nm)  
32 having an active area of  $3 \text{ mm} \times 10 \text{ mm}$ . Indium-tin-oxide (ITO) coated  
33 substrates (sheet resistance:  $10 \Omega/\square$ ) were cleaned with following sequence:  
34 in acetone, methanol, and diluted water, then annealed at  $120 \text{ }^\circ\text{C}$  for 20 min  
35 followed by  $\text{O}_2$  plasma treatment. The chlorobenzene solutions of TPD(BTPA) $_n$   
36 (20 mg/mL) were spincoated on a cleaned ITO-coated glass substrate several  
37 times at a spinning rate of 2000 rpm to achieve the hole transport layers with  
38 the thickness of  $\sim 1 \mu\text{m}$ , and then the films were baked at  $50 \text{ }^\circ\text{C}$  for 25 min in  
39 nitrogen atmosphere to evaporate any residual solvent. Then, a 120nm Al  
40 were evaporated as the cathode.

41

## 42 **OLED Fabrication**

43

44 The chlorobenzene solutions of TPD(BTPA) $_n$  (20 mg/mL) were spincoated on  
45 cleaned ITO-coated glasses at 2000 rpm, then baked at  $50 \text{ }^\circ\text{C}$  for 25 min in  
46 nitrogen atmosphere achieved the hole injection/transport layer with the  
47 thickness of  $\sim 200 \text{ nm}$ . Then, Alq $_3$  layer was vacuum deposited onto the  
48 TPD(BTPA) $_n$ -layer with thickness of  $\sim 70 \text{ nm}$  at a deposition rate of  $2\text{-}3 \text{ \AA s}^{-1}$  at  
49  $10^5 \text{ Torr}$ . Finally, LiF (0.5 nm) and Al (120 nm) were evaporated as the cathode.  
50 The three-layer device using spin-coating PEDOT:PSS as hole injection layer  
51 was fabricated. The spinning rate of PEDOT:PSS solvent was 4000 rpm, then

1 baked at 100 °C for 20 min in nitrogen atmosphere achieved the thickness of  
2 ~100 nm.

### 3 4 **Materials**

5  
6 4-[N,N-di(p-tolyl)amino]benzaldehyde and p-TPD were purchased from Tianjin  
7 Zhongmin Technology Co. LTD, and recrystallized from ethanol before use, and  
8 other reagents such as N,N-dimethylformamide phosphorus oxychloride  
9 (POCl<sub>3</sub>), 1,2-dichloroethane, petroleum ether, ethyl acetate, dichloromethane,  
10 etc were purchased from Tianjin Guangfu Fine Chemical Research Institute.  
11 N,N-dimethyl formamide (DMF), POCl<sub>3</sub>, THF were freshly distilled before use.

### 12 13 **4-((4'-(diphenylamino)-[1,1'-biphenyl]-4-yl)(phenyl)amino)benzaldehyde (1)**

14  
15 A suspension of TPD (2.20 g, 4.5 mmol) in DMF (80 mL) was cooled to 0 °C and  
16 then phosphorus oxychloride (6.90g, 45 mmol) was added dropwise under the  
17 protection of nitrogen. The mixture was stirred for 24 h at 15 °C and then was  
18 poured into ice water mixture (300 mL) followed by filtration to afford crude  
19 product, and then the crude product was purified by column chromatography  
20 (petroleum ether: ethyl acetate =15:1 as eluent) to afford the title compound  
21 1 (1.20 g, 50%). Mp:164-166 °C; <sup>1</sup>H NMR(500 MHz, CDCl<sub>3</sub>) δ(ppm):7.025-7.055  
22 (m, 7H), 7.095 (d, 8H, J = 8.5), 7.166 (t, 4H), 7.235 (t, 2H), 7.422 (d, 2H, J =9.0),  
23 7.502 (d, 2H, J = 8.5), 7.668 (d, 2H, J = 8.5), 9.802 (s, 1H); ESI-MS (m/z): 544.7  
24 [M+].

### 25 26 **4,4'-([1,1'-biphenyl]-4,4'-diylbis(phenylazanediyl))dibenzaldehyde (2)**

27  
28 Compound 2 was synthesized according to the method described above. The  
29 reaction was carried out at 95 °C for 24 h after phosphorus oxychloride was  
30 added. After cooling to room temperature, the mixture was poured into ice  
31 water mixture (300 mL) and then filtered to afford crude product. The crude  
32 product was purified by column chromatography petroleum ether: ethyl  
33 acetate = 5:1 as eluent to afford the title compound 2 (2.0 g, 75%). Mp.170-  
34 172 °C; <sup>1</sup>H NMR (500MHz, CDCl<sub>3</sub>) δ(ppm): 7.079 (d, 4H, J=9.0), 7.209-7.240 (m,  
35 10H), 7.370 (d, 4H, J= 9.0), 7.540(d, 4H, J= 8.5), 7.702 (d, 4H, J = 8.5), 9.833 (s,  
36 2H); ESI-MS (m/z): 545.6 [M+].

### 37 38 **4,4',4'',4'''-([1,1'-biphenyl]-4,4'-diylbis(azanetriyl))tetrabenzaldehyde (3)**

39  
40 Compound 3 was synthesized according to the method described above. The  
41 reaction was carried out at 150 °C for 24 h after phosphorus oxychloride was  
42 added. After cooling to room temperature, the mixture was poured into ice  
43 water mixture (300 mL) and then filtered to afford crude product. The crude  
44 product was purified by column chromatography petroleum ether: ethyl  
45 acetate = 5:1 as eluent to afford the title compound 2 (2.1 g, 80%). Mp.181-  
46 182 °C; <sup>1</sup>H NMR(500 MHz,CDCl<sub>3</sub>) δ(ppm): 7.080(d, 8H, J= 9.0), 7.209-7.240 (m,  
47 12H), 7.381(d, 4H, J =9.0), 9.823 (s,4H); ESI-MS (m/z): 573.6 [M+].

### 48 49 **4-[N,N-di-(p-tolyl)amino]styrene (4)**

50  
51 Methyl triphenylphosphonium bromide (17.51 g, 49 mmol) and 4-[N,N'-di(p-  
52 tolyl) amino] benzaldehyde (10.49 g, 35 mmol) were added into a round-  
53 bottom flask. The apparatus was evacuated and flushed with N<sub>2</sub> three times.  
54 Dry THF (100 mL) was added to the flask and the mixture was cooled to 0 °C. A  
55 THF solution (20 mL) of t-BuOK (2.5 M) was injected slowly to the flask and the  
56 mixture stirred for 10 min at 0 °C. The reaction mixture was stirred for  
57 another 4 h at room temperature, and then poured into ice water mixture  
58 followed by extraction with dichloromethane. The organic layer was dried over

1 MgSO<sub>4</sub>. After evaporation of solvent, the crude product 4 was obtained. The  
2 crude product was purified by column chromatography petroleum ether: ethyl  
3 acetate = 10:1 as eluent to afford the title compound 4 as a pale yellow solid.  
4 Mp: 72-74 °C; <sup>1</sup>H NMR (500 MHz, CDCl<sub>3</sub>) δ (ppm): 2.32 (s, 6H), 5.13 (d, 1H, J  
5 =11.0), 5.61 (d, 1H, J =17.5), 6.68 (dd, 1H, J1 =11.0, J2 =17.5), 6.97 (d, 2H, J  
6 =8.5), 6.99 (d, 4H, J =8.5), 7.06 (d, 4H, J =8.5), 7.25 (d, 2H, J =8.5); MS:Found M  
7 + H 300.8, Calcd for C<sub>22</sub>H<sub>21</sub>N M + 299.4.

8

### 9 **3-(4-(N,N-di-(p-tolyl)amino)phenyl)acrylaldehyde (5)**

10

11 A solution of compound 5 (1.50 g, 5 mmol) in DMF (40 mL) was cooled to  
12 0 °C and then phosphorus oxychloride (7.62 g, 50 mmol) was added dropwise  
13 to solution under nitrogen. The mixture was stirred for 6 h at 85 °C. After  
14 cooling to room temperature, the mixture was poured into ice water mixture  
15 (300 mL) and then filtered. The crude product was purified by column  
16 chromatography (petroleum ether: ethyl acetate =9:1 as eluent) to obtain the  
17 title compound 6 (1.4 g, 86%). Mp. 130 - 132 °C; <sup>1</sup>H NMR (CDCl<sub>3</sub>, 500 MHz) δ:  
18 9.63 (d, 1H, J = 8.0), 7.39-7.36 (m, 3H, PhH), 7.13 (d, 4H, J = 8.5), 7.05 (d, 4H, J  
19 =8.5), 6.95 (d, 2H, J =8.5), 6.59 (dd, 1H, J = 15.5), 2.34 (s, 6H); ESI-MS (M/z):  
20 328.4 [M+].

21

### 22 **3-(4-(N,N-di-(p-tolyl)amino)phenyl)propenol (6)**

23

24 Compound 5 (1.97 g, 6.0 mmol) and NaBH<sub>4</sub> (0.28 g, 7.2 mmol) were heated  
25 under reflux in EtOH (10 mL) and dichloromethane (30 mL) for 1 h. The  
26 mixture was poured into ice water mixture and extracted with diethyl ether.  
27 The organic layer was dried over MgSO<sub>4</sub>. After evaporation of solvent, the  
28 resulting viscous oil was allowed to solidify in methanol (20 mL) to afford the  
29 title compound 6 (1.85 g, 92%). Mp. 52-54 °C; <sup>1</sup>H NMR (500 MHz, CDCl<sub>3</sub>) δ(ppm):  
30 2.307 (s, 6H), 4.287(d, 2H, J = 6.0), 6.517(d, 2H, J = 15.5), 6.945(d, 2H, J = 8.5),  
31 6.975 (d, 4H, J = 8.5), 7.049 (d, 4H, J = 8.0), 7.210 (d, 2H, J = 8.5); ESI-MS (m/z):  
32 329.2 [M+].

33

### 34 **1-[4-(di-(p-tolyl)amino)phenyl]-3-(triphenyl) phosphoniumpropyle ne** 35 **bromide (7)**

36

37 To a solution of compound 6 (2.39 g, 8 mmol) in CHCl<sub>3</sub> (60 mL) was added  
38 triphenylphosphonium hydrogen bromide (2.70 g, 8 mmol). The mixture was  
39 heated under reflux for 2 h and then the solvent distilled off to dryness, then  
40 diethyl ether was added to solidifying the crude products. The title compound  
41 7 was obtained as a light yellow solid (4.77 g, 96%). Mp. 110 - 113 °C; <sup>1</sup>H NMR  
42 (500 MHz, CDCl<sub>3</sub>) δ(ppm): 2.304 (s, 6H), 4.970 (d, 2H, J=15.0), 6.836 (d, 2H,  
43 J=8.5), 6.950-7.062 (m, 12H), 7.663-7.904 (m, 15H). ESI-MS (m/z): 573.3 [M-Br].

44

### 45 **General Procedure for TPD(BTPA)<sub>1</sub>, TPD(BTPA)<sub>2</sub> and TPD(BTPA)<sub>4</sub>**

46

47 Compound 7 (2.52g, 4mmol) and 3 (0.30 g, 0.5 mmol) were weighed into a  
48 round-bottom flask. The apparatus was evacuated and flushed with N<sub>2</sub> three  
49 times. Dry THF (50 mL) was added to the flask and the mixture was cooled to 0  
50 °C. A THF solution (10 mL) of t-BuOK (1 M) was added dropwise to the mixture  
51 and the mixture was stirred for 10 min at 0 °C. The reaction mixture was  
52 stirred at room temperature until compound 1 was consumed completely  
53 (monitored by thin-layer chromatography). The reaction solution was poured  
54 into ice water mixture and extracted with dichloromethane. The organic layer  
55 was dried over MgSO<sub>4</sub>. The crude product was obtained after the solvents  
56 were removed under reduced pressure.

57 The crude product was heated under reflux for 8 h in THF with a catalytic  
58 amount of iodine, then the remaining iodine was removed by pouring into

1 sodium hydroxide solution ( $W_t = 10\%$ , 100 mL) and stirred for 2 h. After  
2 extraction with dichloromethane, the solvent was removed under reduced  
3 pressure and the residues were chromatographed on a silica gel column  
4 (petroleum ether: dichloromethane = 20:1 as eluent) to give title compound as  
5 a pure E stereoisomer.

6 **TPD(BTPA)<sub>1</sub>**: Yield 72%. Mp. 203-204 °C; IR ( $\text{cm}^{-1}$ , KBr): 3025, 2919, 1597,  
7 1500, 1331, 1280, 976, 818;  $^1\text{H NMR}$  (500 MHz, Chloroform)  $\delta = 7.83 - 7.72$   
8 (m, 4H), 7.62 - 7.50 (m, 4H), 7.44 - 7.33 (m, 4H), 7.31 - 6.94 (m, 29H), 6.71 (d,  
9  $J=30.2$ , 2H), 2.32 (s, 6H); HRMS: Found:  $m/z$  812.4313 (M+), Calcd for  
10  $\text{C}_{60}\text{H}_{49}\text{N}_3$ : M+H, 812.4313.

11 **TPD(BTPA)<sub>2</sub>**: Yield 68%. Mp. 177-178 °C; IR ( $\text{cm}^{-1}$ , KBr): 2912, 1600, 1508, 1320,  
12 969, 807;  $^1\text{H NMR}$  (500 MHz, Chloroform)  $\delta = 7.86 - 7.70$  (m, 8H), 7.64 - 7.47  
13 (m, 4H), 7.43 - 7.32 (m, 4H), 7.29 - 6.91 (m, 38H), 6.71 (d,  $J=30.2$ , 4H), 2.32 (s,  
14 12H); HRMS: Found:  $m/z$  1335.5985 (M+), Calcd for  $\text{C}_{84}\text{H}_{70}\text{N}_4$ : M+H, 1335.5986.

15 **TPD(BTPA)<sub>4</sub>**: Yield 63%; Mp. 260-262 °C; IR ( $\text{cm}^{-1}$ , KBr): 2928, 2853, 1603, 1500,  
16 1321, 964, 823;  $^1\text{H NMR}$  (500 MHz,  $\text{CDCl}_3$ )  $^1\text{H NMR}$  (500 MHz, Chloroform)  $\delta =$   
17 7.89 (s, 16H), 7.55 (s, 8H), 7.37 (s, 8H), 7.15 (t,  $J=12.5$ , 48H), 6.90 (s, 8H), 2.32  
18 (s, 24H); HRMS: Found:  $m/z$  1782.8322 (M+), Calcd for  $\text{C}_{132}\text{H}_{112}\text{N}_6$ .

19

# 1 Synthesis and Characterizations

2

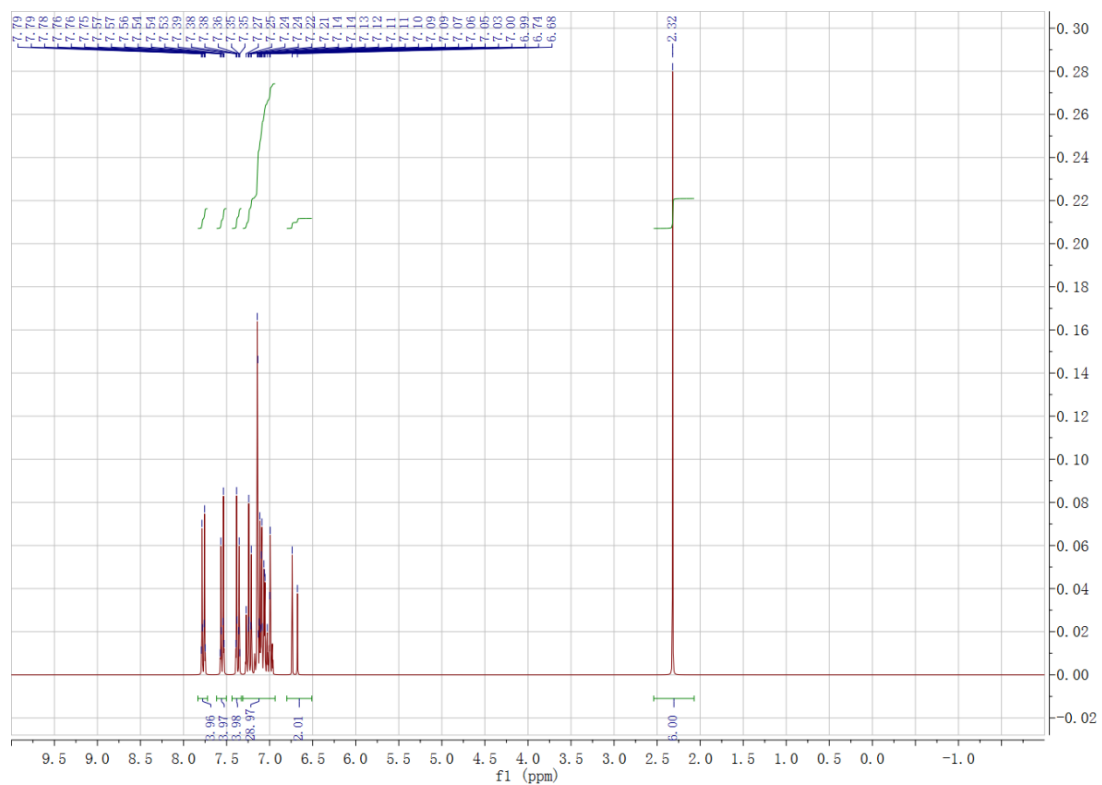

3

4

**Fig. S1.**  $^1\text{H}$  NMR spectrum of  $\text{TPD}(\text{BTPA})_1$

5

6

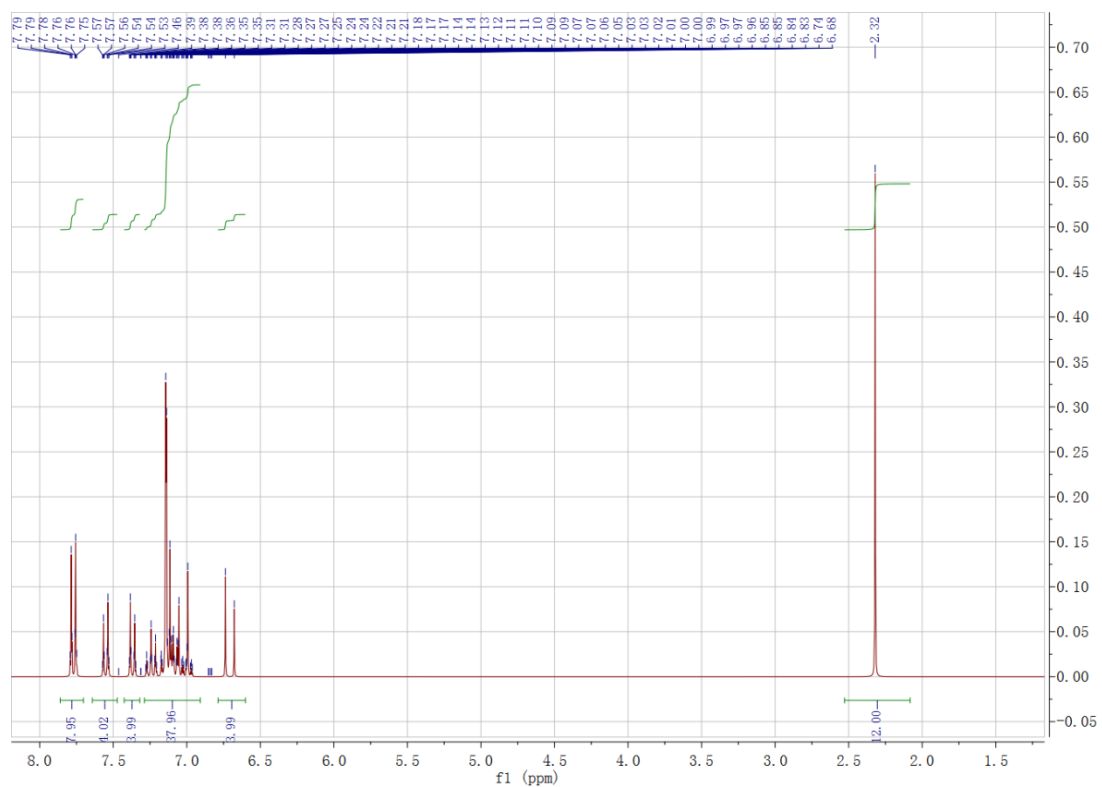

1  
2

**Fig. S2.**  $^1\text{H}$  NMR spectrum of  $\text{TPD}(\text{BTPA})_2$

1

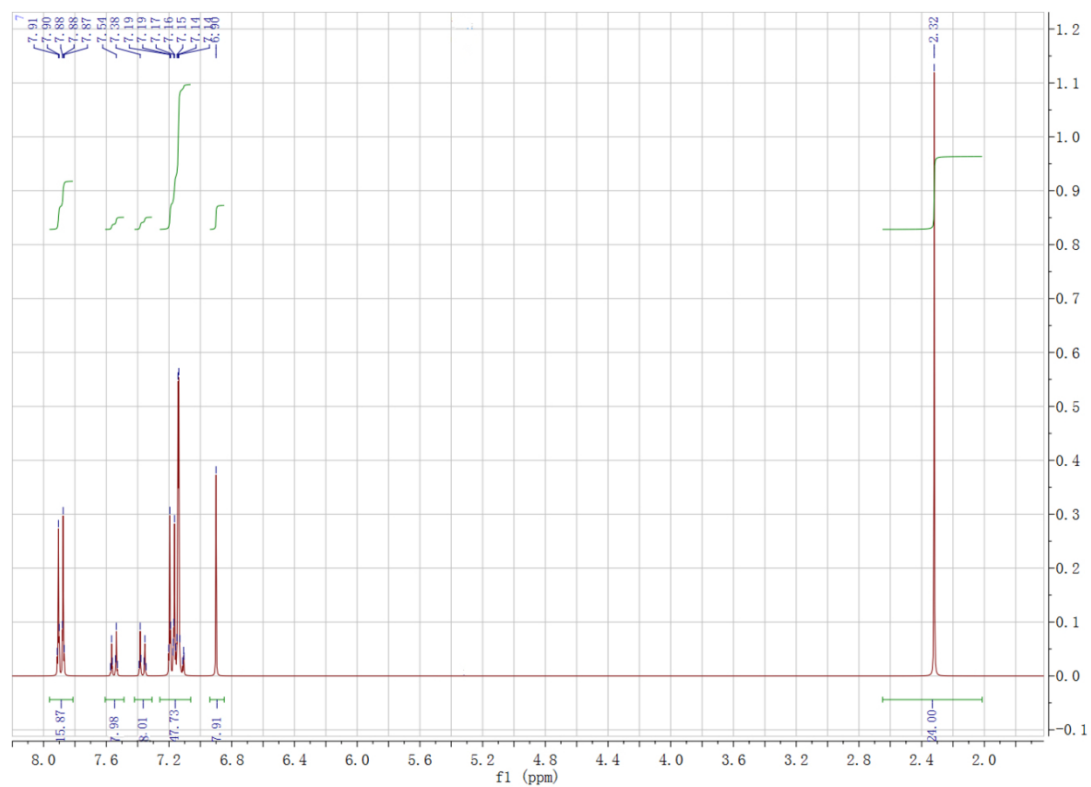

2

3

**Fig. S3.** <sup>1</sup>H NMR spectrum of TPD(BTPA)<sub>4</sub>

4



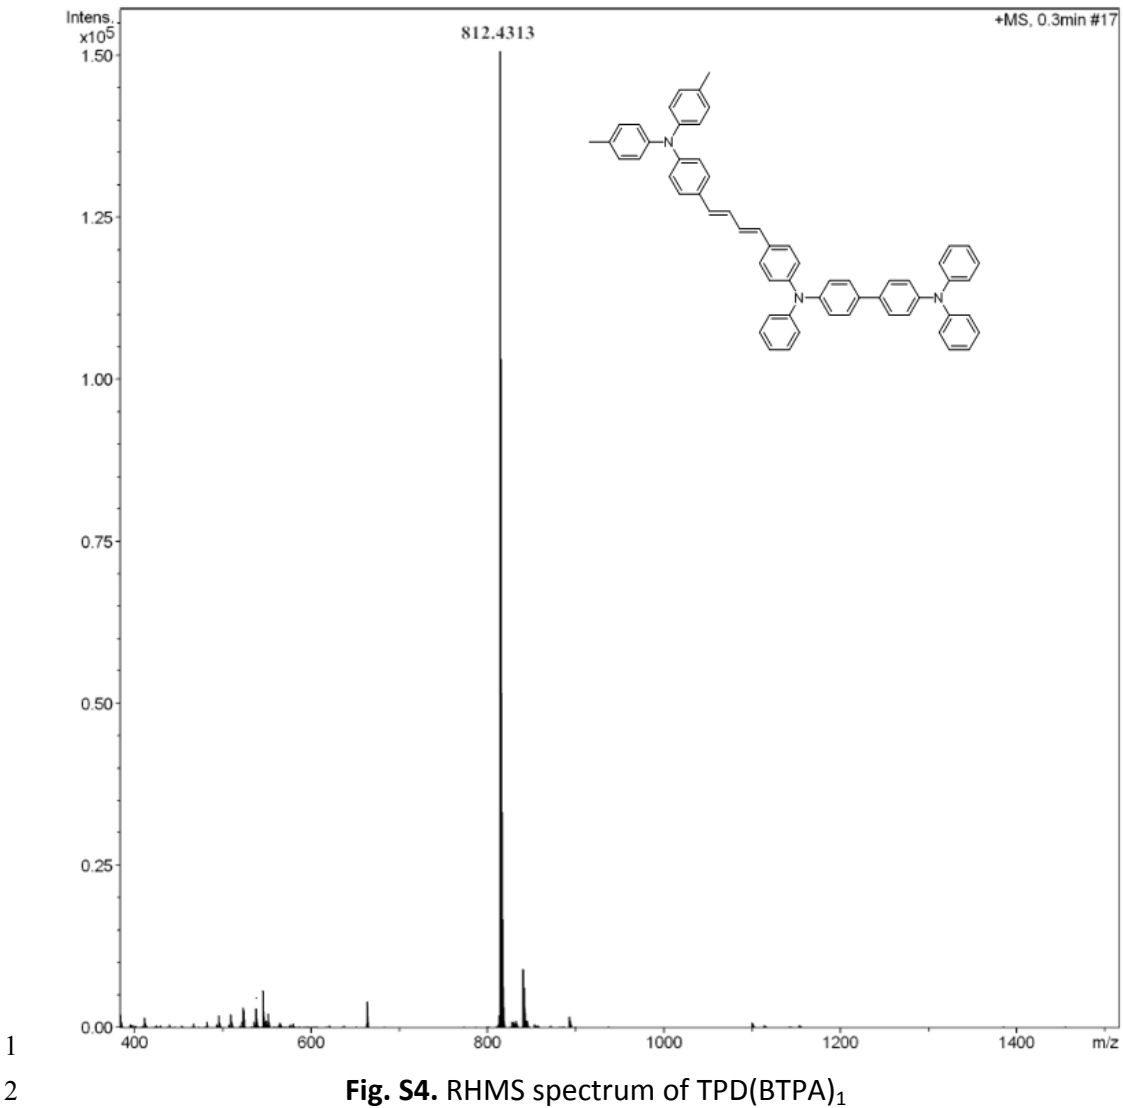

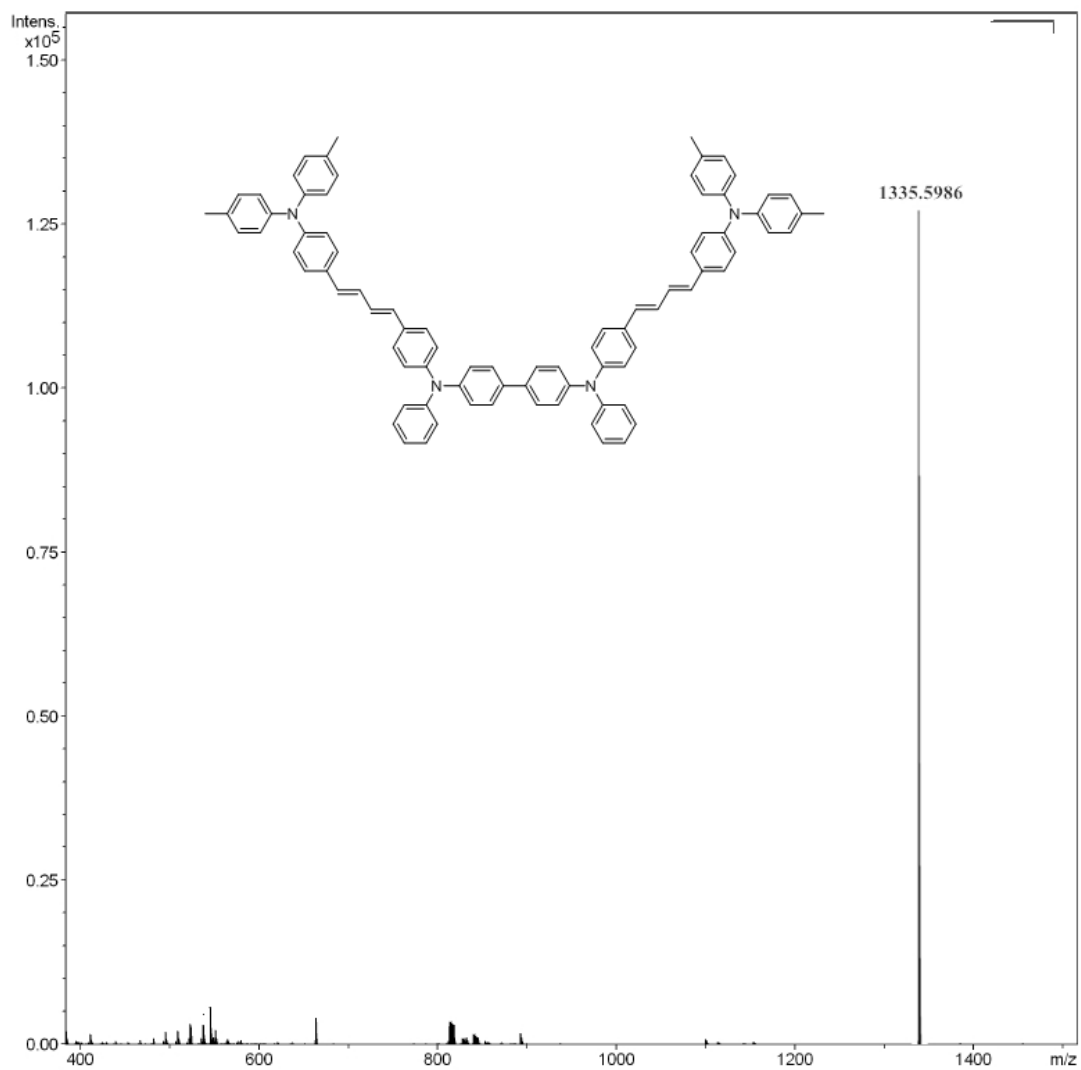

1  
2  
3

**Fig. S5.** RHMS spectrum of TPD(BTPA)<sub>2</sub>

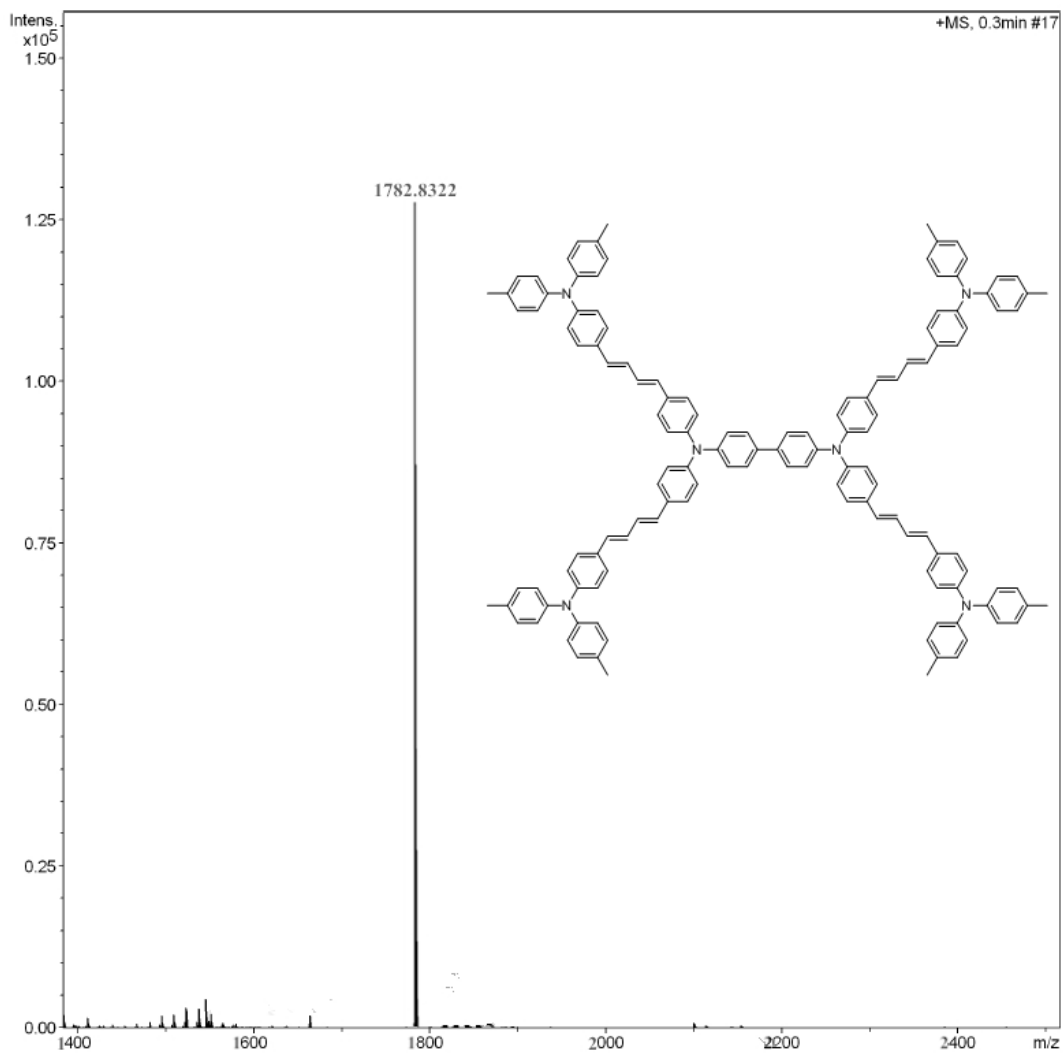

**Fig. S6.** RHMS spectrum of TPD(BTPA)<sub>4</sub>

1  
2  
3  
4

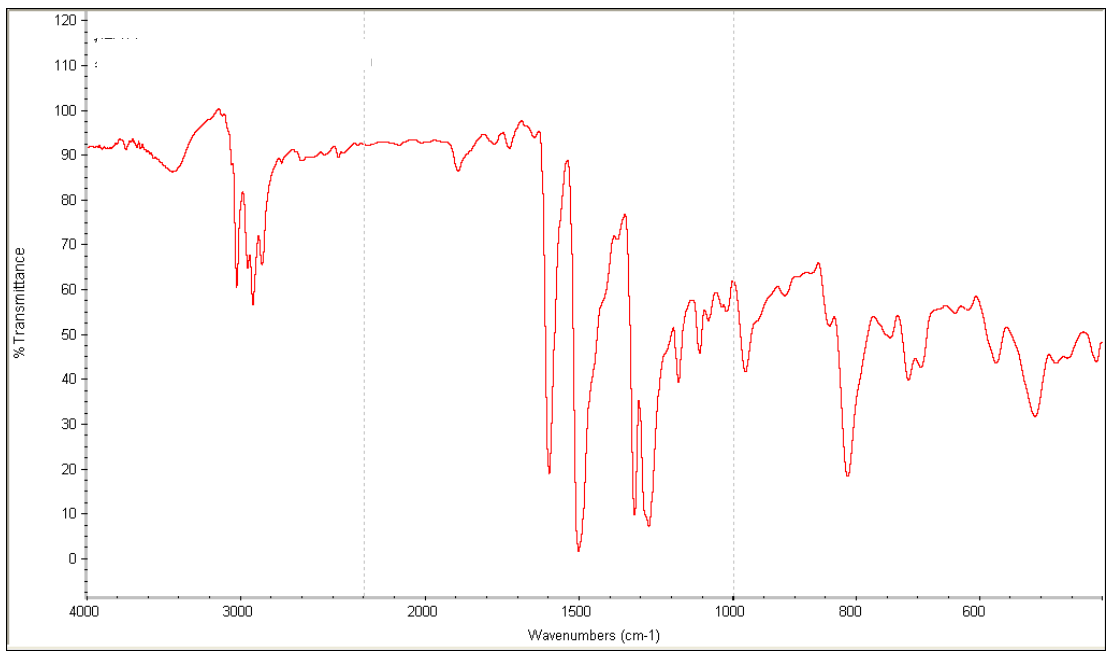

1  
2

**Fig. S7.** IR spectrum of TPD(BTPA)<sub>1</sub>

1  
2

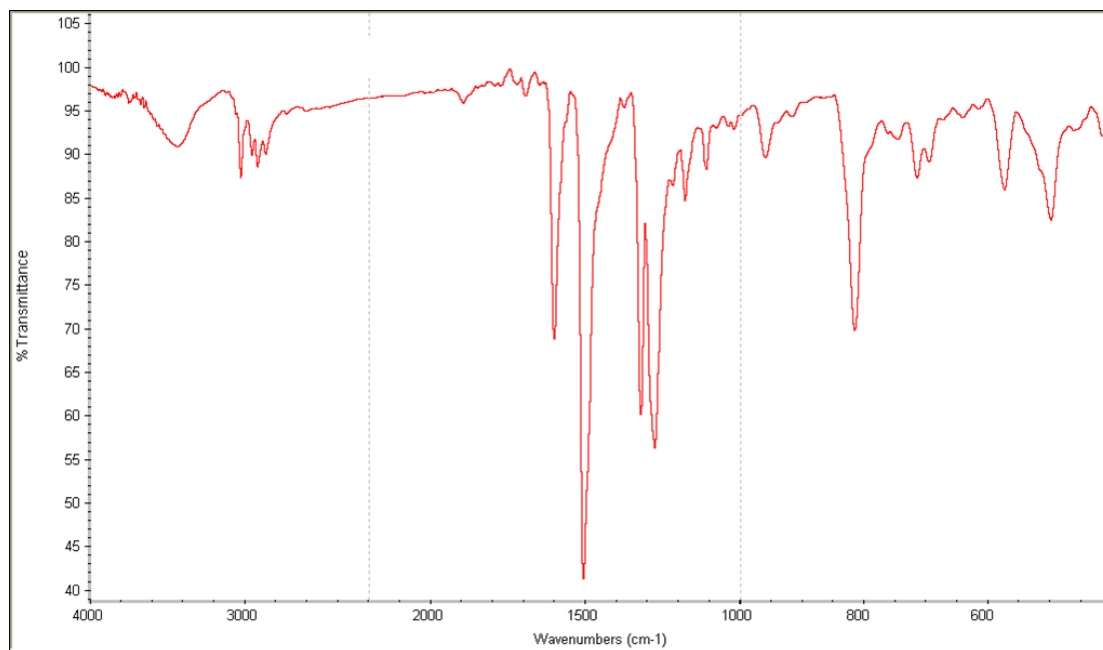

3  
4

**Fig. S8.** IR spectrum of TPD(BTPA)<sub>2</sub>

1

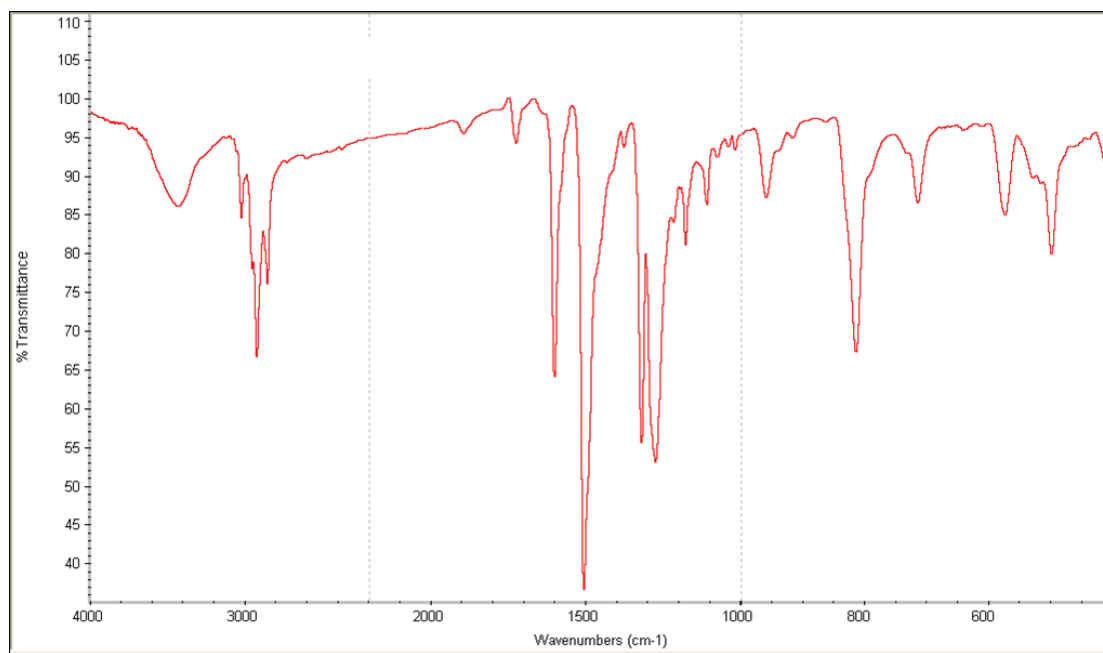

2

3

4

5

**Fig. S9.** IR spectrum of TPD(BTPA)<sub>4</sub>

1

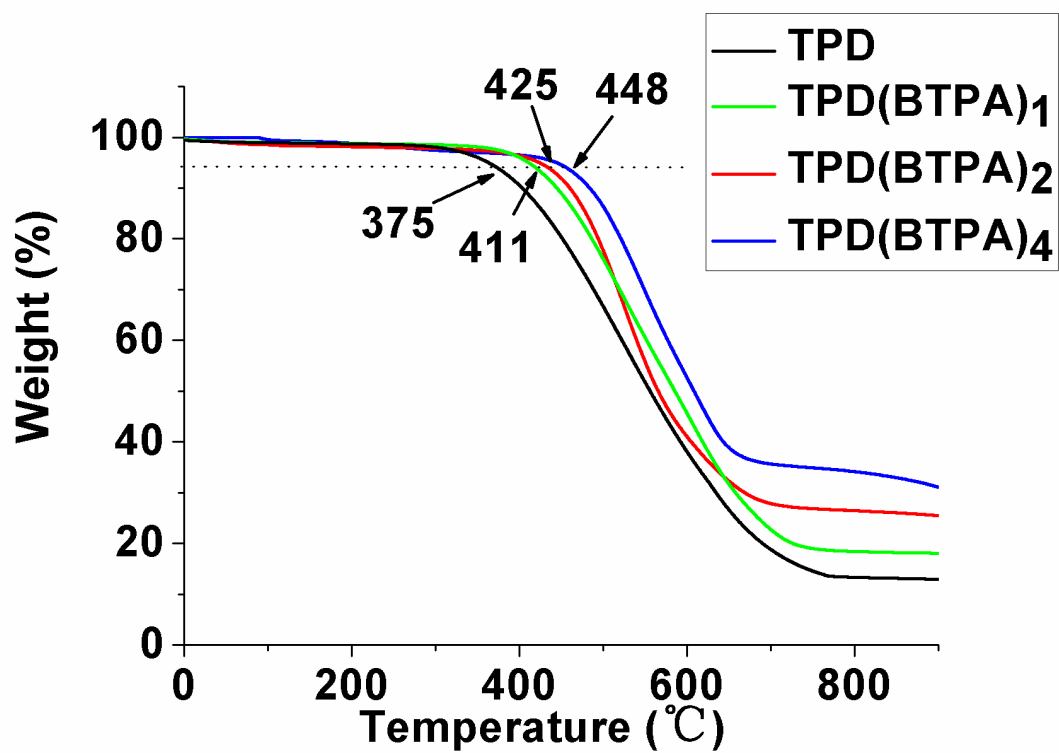

2

3

4

Fig. S10. TGA thermograms of TPD(BTPA)<sub>n</sub> (n=1,2,4)

1 Photophysical and Electrochemical Properties

2

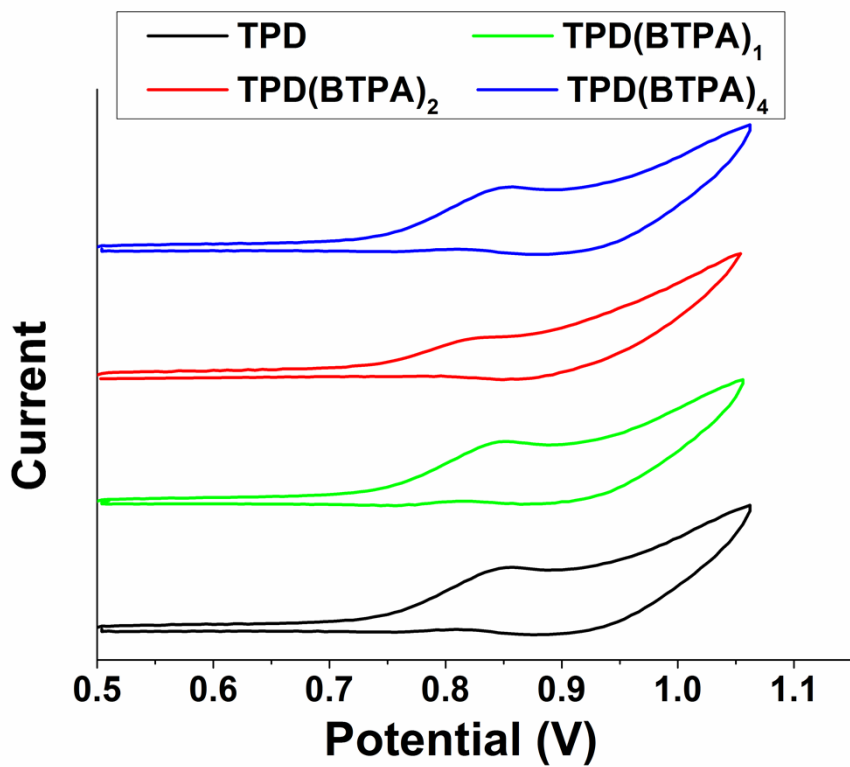

3

4

Fig. S11. Cyclic voltammograms of TPD(BTPA)<sub>n</sub> (n=0,1,2,4)

5

6

7

8

9

10

11

12

13

14

15

16

17

18

19

20



# 1 Hole Mobility Properties

2

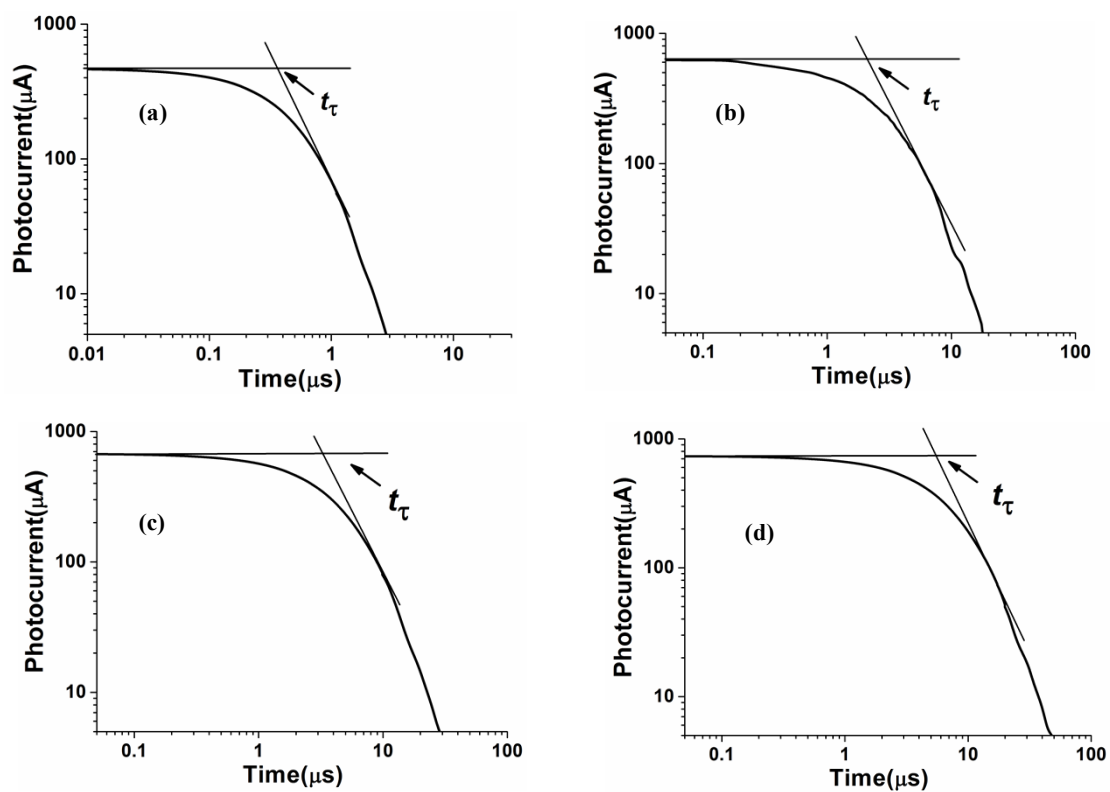

3

4 **Fig. S12** TOF transients for TPD(a), TPD(BTPA)<sub>1</sub> (b), TPD(BTPA)<sub>2</sub> (c), TPD(BTPA)<sub>4</sub> (d)  
5 at room temperature.

6

## 1 Molecular Geometry

2

3 To get further insight into the effect of molecular structures and electron  
4 distributions of HTM, the geometries of the obtained compounds TM1wTM4 were  
5 optimized and their energies were estimated by density functional theory (DFT)  
6 calculation at the B3LYP/6-31G(d) level with Gaussian 03 program. <sup>[1]</sup>

7

8 **Table S1.** The optimized molecular structures and frontier molecular orbital of  
9 compounds TPD(BTPA)<sub>n</sub> (n=0,1,2,4)

| Compound               | Opt Structure                                                                       | HOMO                                                                                 | LUMO                                                                                  |
|------------------------|-------------------------------------------------------------------------------------|--------------------------------------------------------------------------------------|---------------------------------------------------------------------------------------|
| TPD                    | 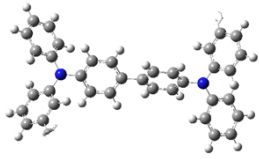   |    |    |
| TPD(BTPA) <sub>1</sub> |   |   |   |
| TPD(BTPA) <sub>2</sub> |  |  |  |
| TPD(BTPA) <sub>4</sub> |  |  |  |

10

11

1

2 **Table S2.** The quantum chemistry calculational data of compounds TPD(BTPA)<sub>n</sub>  
3 (n=0,1,2,4)

| Compound               | HOMO(eV) | LUMO(eV) | E <sub>g</sub> (eV) |
|------------------------|----------|----------|---------------------|
| TPD                    | -4.85    | -1.40    | 3.45                |
| TPD(BTPA) <sub>1</sub> | -4.42    | -1.44    | 2.98                |
| TPD(BTPA) <sub>2</sub> | -4.42    | -1.46    | 2.96                |
| TPD(BTPA) <sub>4</sub> | -4.39    | -1.49    | 2.90                |

4

5

6

7

1 Hole Injection/Transport Properties in OLEDs

2

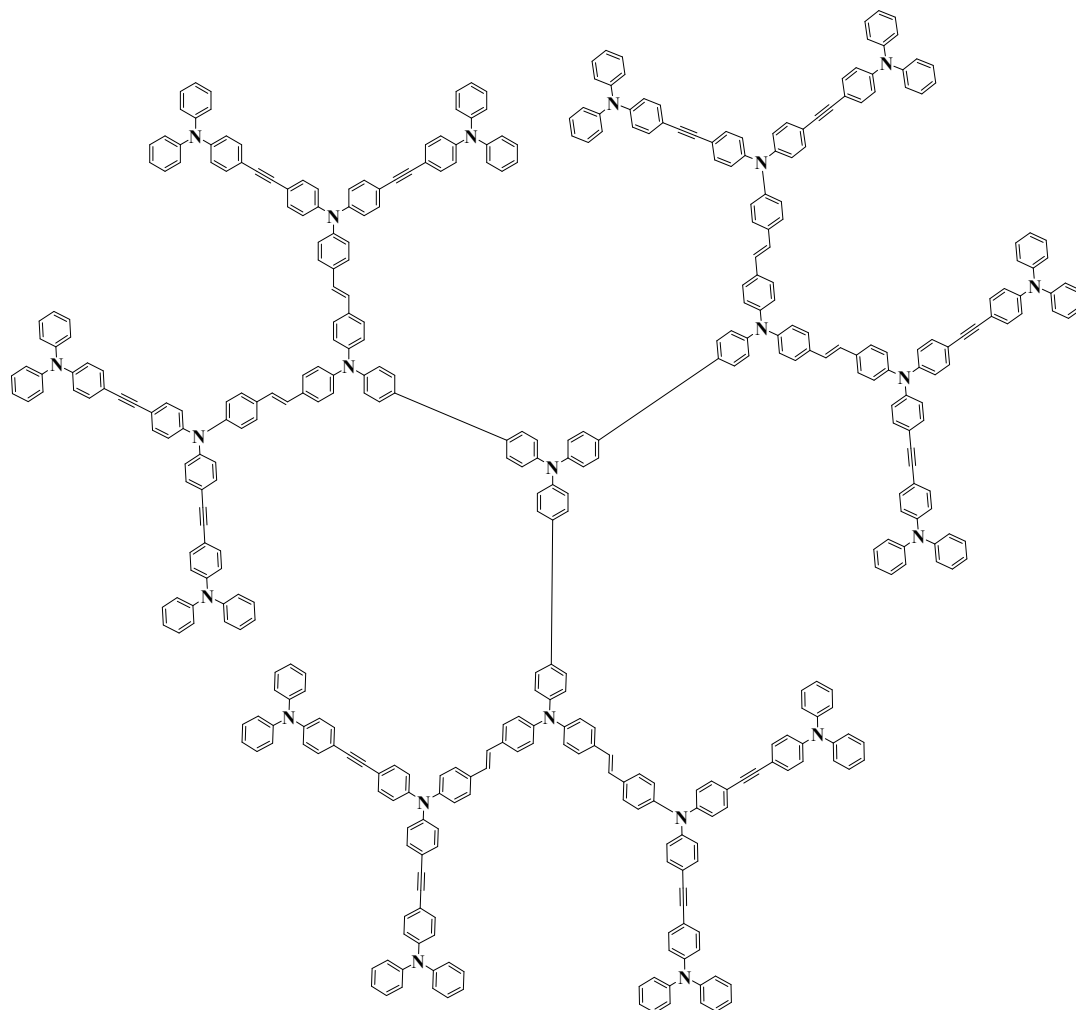

3

4

5

DT2<sup>2</sup>

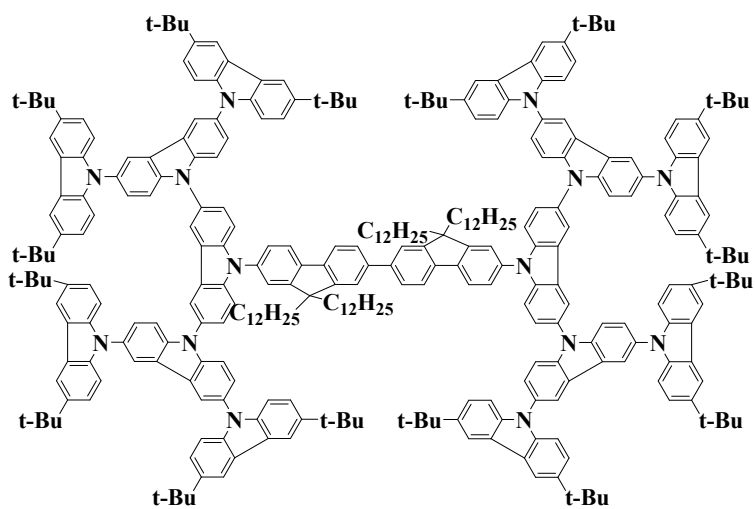

6

7

8

9

G3F2<sup>3</sup>

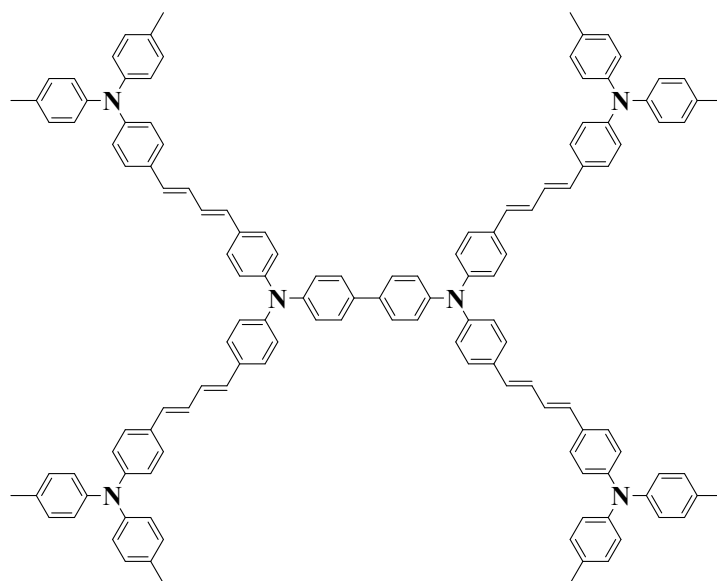

**TPD(BTPA)<sub>4</sub>**

1  
2  
3

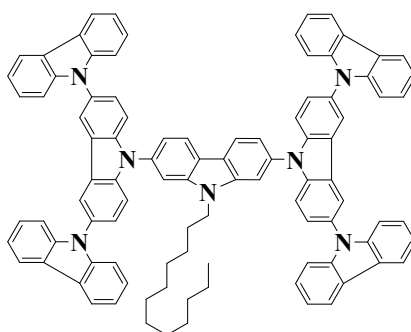

**G3C<sub>4</sub>**

4  
5  
6

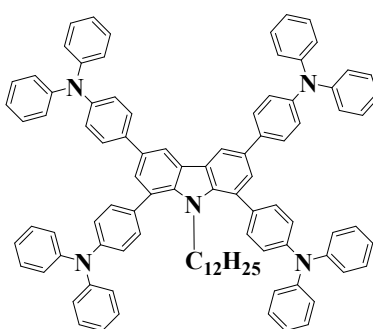

**T4C<sub>5</sub>**

7  
8  
9

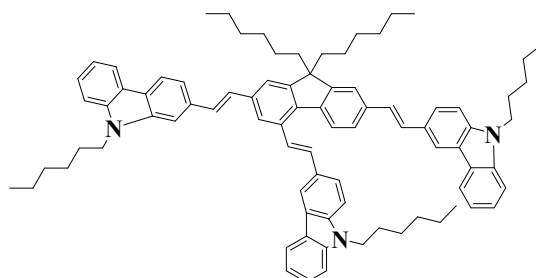

**FC<sub>6</sub>**

10  
11

1

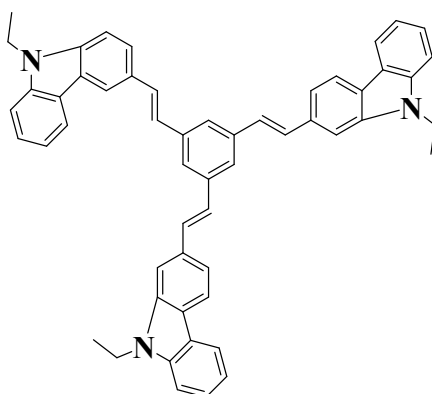

2

3

4

**TECEB<sup>7</sup>**

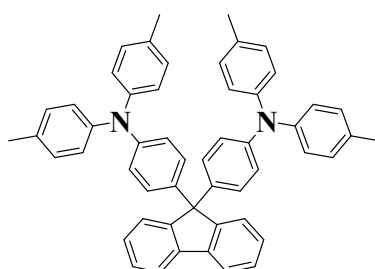

5

6

7

**FTPD7<sup>8</sup>**

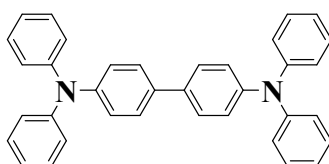

8

9

10

11

**TPD<sup>9</sup>**

**Fig. S13.** Molecular structure of HTMs

- 1 1. M. J. Frisch, *Chem Listy*, 2006, **100**, A9-A9.
- 2 2. Z. A. Li, T. L. Ye, S. Tang, C. Wang, D. G. Ma and Z. Li, *J Mater Chem C*, 2015, **3**, 2016-2023.
- 3 3. P. Moonsin, N. Prachumrak, S. Namuangruk, S. Jungsuttiwong, T. Keawin, T. Sudyoadsuk and  
4 V. Promarak, *J Mater Chem C*, 2014, **2**, 5540-5552.
- 5 4. N. Prachumrak, S. Pansay, S. Namuangruk, T. Kaewin, S. Jungsuttiwong, T. Sudyoadsuk and V.  
6 Promarak, *Eur J Org Chem*, 2013, **2013**, 6619-6628.
- 7 5. P. Kochapradist, N. Prachumrak, R. Tarsang, T. Keawin, S. Jungsuttiwong, T. Sudyoadsuk and  
8 V. Promarak, *Tetrahedron Lett*, 2013, **54**, 3683-3687.
- 9 6. C. S. Wu, S. W. Fang and Y. Chen, *Phys Chem Chem Phys*, 2013, **15**, 15121-15127.
- 10 7. J. Y. Li, D. Liu, Y. Q. Li, C. S. Lee, H. L. Kwong and S. T. Lee, *Chem Mater*, 2005, **17**, 1208-1212.
- 11 8. O. T. Okutsu S, Tamano M, et al, *Electron Devices*, 1997, **44**, 1302-1306.
- 12 9. S. Feng, L. Duan, L. D. Hou, J. Qiao, D. Q. Zhang, G. F. Dong, L. D. Wang and Y. Qiu, *J Phys  
13 Chem C*, 2011, **115**, 14278-14284.

14  
15  
16  
17  
18  
19  
20  
21  
22  
23
